# Supplementary material for: Hierarchical Mn-Ni2P/NiFe LDH nanosheet arrays as an efficient bifunctional electrocatalyst for energy-saving hydrogen production via urea electrolysis
Source: Royal Society of Chemistry journal article supplement (doi:10.1039/d3cc01493b), 2023-01-01
Supplement: d3cc01493b1.pdf [file d3cc01493b1.pdf]

## Supporting Information

### **Hierarchical Mn-Ni<sub>2</sub>P/NiFe LDH nanosheets arrays as an efficient bifunctional electrocatalyst for energy-saving hydrogen production *via* urea electrolysis**

Bin Sang,<sup>b</sup> Yu Liu,<sup>a</sup> Xiaoyu Wan,<sup>a\*</sup> Shuixiang Xie,<sup>a</sup> Guangyu Zhang,<sup>a</sup> Mingzheng Ge,<sup>a</sup> Jiamu Dai,<sup>a</sup> Wei Zhang,<sup>a\*</sup> and Rui-Qing Li<sup>a\*</sup>

<sup>a</sup> School of Textile and Clothing, Nantong University, Nantong 226019, China

<sup>b</sup> School of Chemistry and Chemical Engineering, Liaocheng University, Liaocheng 252059, China

Corresponding author: [liruiqing@ntu.edu.cn](mailto:liruiqing@ntu.edu.cn); [2022081@ntu.edu.cn](mailto:2022081@ntu.edu.cn);  
[zhangwei@ntu.edu.cn](mailto:zhangwei@ntu.edu.cn)

## 1. Experimental

### 1.1. Chemicals reagents

$\text{Ni}(\text{NO}_3)_2 \cdot 6\text{H}_2\text{O}$ ,  $\text{MnCl}_2 \cdot 4\text{H}_2\text{O}$ ,  $\text{NH}_4\text{F}$ ,  $\text{Fe}(\text{NO}_3)_3 \cdot 9\text{H}_2\text{O}$ , urea and  $\text{NaH}_2\text{PO}_2$  were obtained from Sinopharm Chemical Reagent Co. Ltd. KOH was obtained from Adamas-beta®. NF was obtained from Taiyuan source of power company.

### 1.2. Samples preparation

#### 1.2.1 Preparation of Mn-Ni<sub>2</sub>P

NF (3 cm × 1 cm) was ultrasonically treated for 30 min in HCl aqueous solution followed by subsequent washing of water and ethanol to eliminate impurities and oxides on the surface. The Mn-Ni<sub>2</sub>P was synthesized through following process. Firstly, 1.9 mmol  $\text{Ni}(\text{NO}_3)_2$ , 0.1 mmol  $\text{MnCl}_2$ , 6 mmol  $\text{NH}_4\text{F}$  and 10 mmol urea were mixed in 35 mL distilled water. Then, NF was added into above solution, which was heated at 120 °C for 6 h. After that, Mn-NiOH precursor was washed, and heated in air at 70 °C. Secondly, the Mn-NiOH was further baked to 320 °C for 2h in N<sub>2</sub> with 0.9g  $\text{NaH}_2\text{PO}_2$  as P source to prepare the Mn-Ni<sub>2</sub>P.

#### 1.2.2 Preparation of the Mn-Ni<sub>2</sub>P/NiFe LDH

Typically, 0.25 mmol  $\text{Ni}(\text{NO}_3)_2$ , 0.25 mmol  $\text{Fe}(\text{NO}_3)_3$ , 3 mmol  $\text{NH}_4\text{F}$  and 5 mmol urea were added in water with stirring to get a uniform solution. Then, the Mn-Ni<sub>2</sub>P was submerged in above solution and shifted into 50 mL autoclave, which was maintained for 6 h at 120 °C. After that, the Mn-Ni<sub>2</sub>P/NiFe LDH was prepared after washing and placed at 70 °C for 12 h.

### 1.3. Samples characterization

Phases and components of obtained products was recorded by powder X-ray diffraction (XRD, Bruker D8). The morphology was visualized by scanning electron microscopy (SEM, S-4800) and transmission electron microscopy (TEM, FEI Talos F200X). The surface formation and element valence of products was determined by X-ray photoelectron spectrometer (XPS, Thermo ESCALAB 250).

### 1.4. Electrochemical measurements

Electrochemical tests were implemented in standard three-electrode system by biologic VMP3 electrochemical workstation, and obtained materials was employed as working

electrodes. The catalytic behavior was measured at a scan rate of  $2 \text{ mV s}^{-1}$  in alkaline electrolyte without and with  $0.5 \text{ M}$  urea. All potentials were rectified. Electrocatalytic active area (ECSA) was tested at diverse scan rates in non-Faradaic region. Electrochemical impedance spectroscopy (EIS) was performed at a frequency from  $100 \text{ kHz}$  to  $0.01 \text{ Hz}$  with a  $5 \text{ mV AC}$  amplitude.

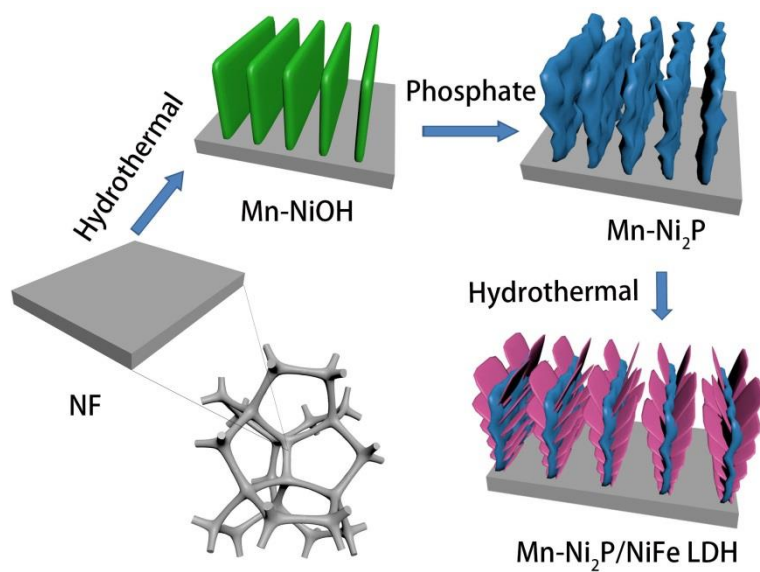

Fig. S1. Schematic diagram for synthesizing Mn-Ni<sub>2</sub>P/NiFe LDH.

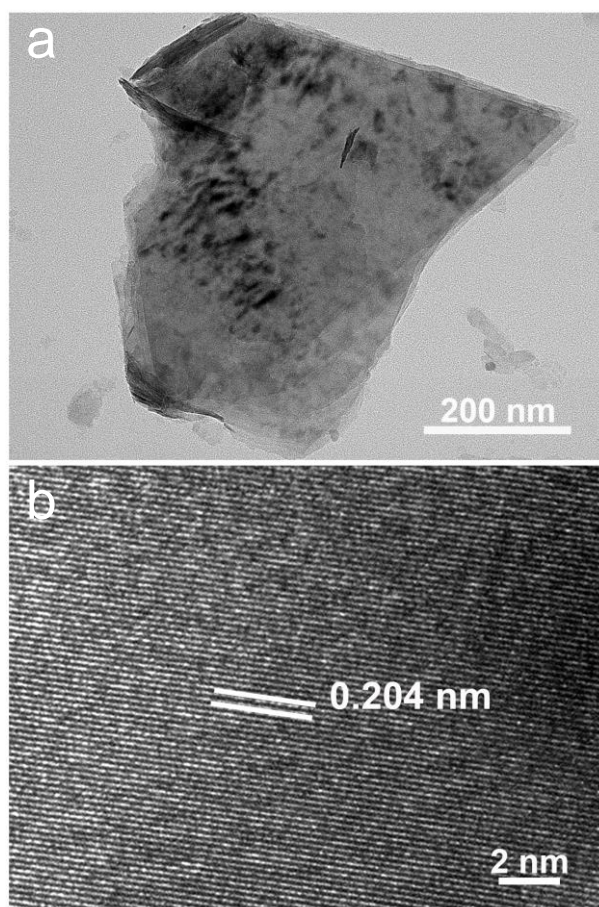

Fig. S2. (a) TEM and (b) HRTEM images of Mn-NiOH and Mn-Ni<sub>2</sub>P.

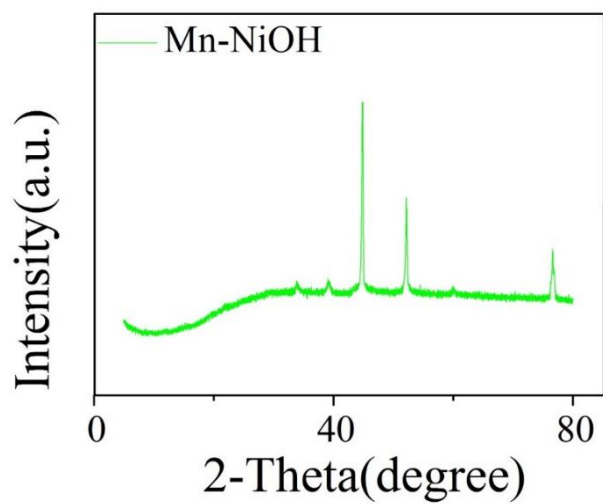

Fig. S3. XRD pattern of Mn-NiOH.

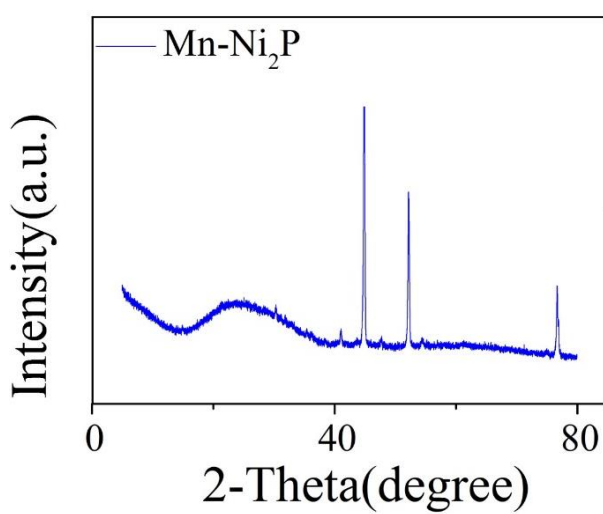

Fig. S4. XRD pattern of Mn-Ni<sub>2</sub>P.

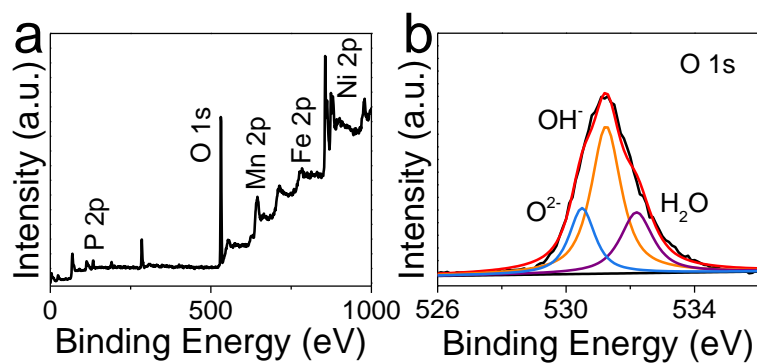

Fig. S5. XPS spectra of (a) survey scan and (b) O 1s for Mn-Ni<sub>2</sub>P/NiFe LDH.

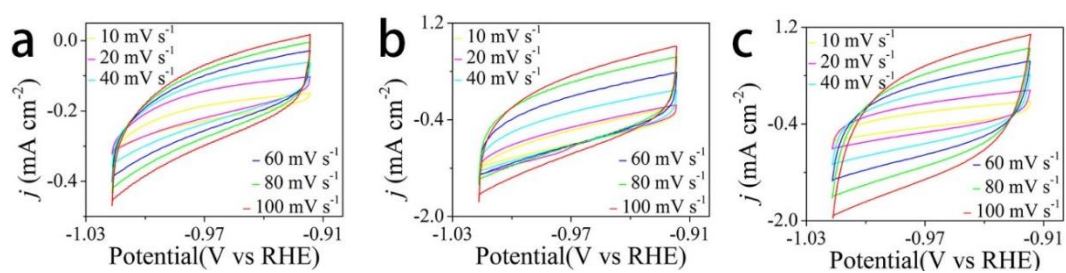

Fig. S6. CV curves of Ni<sub>2</sub>P (a), Mn-Ni<sub>2</sub>P (b), and Mn-Ni<sub>2</sub>P/NiFe LDH (c).

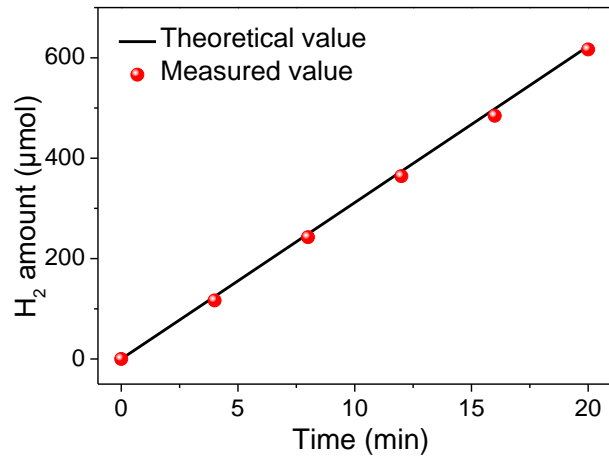

Fig. S7. Experimental and theoretical calculated amount of evolved H<sub>2</sub> over the Mn-Ni<sub>2</sub>P/NiFe LDH.

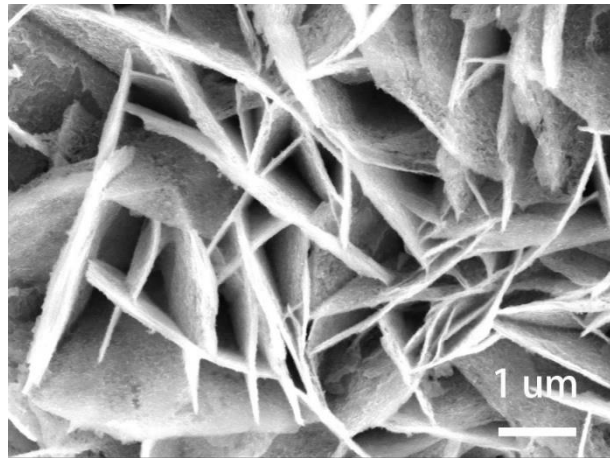

Fig. S8. SEM image of Mn-Ni<sub>2</sub>P/NiFe LDH after HER stability.

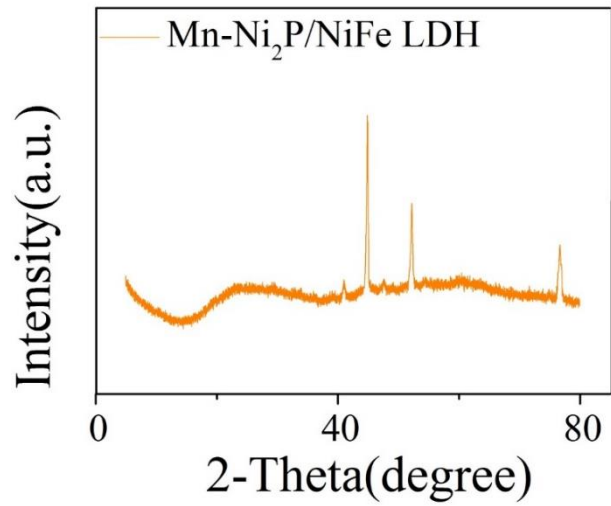

Fig. S9. XRD pattern of the Mn-Ni<sub>2</sub>P/NiFe LDH after HER stability.

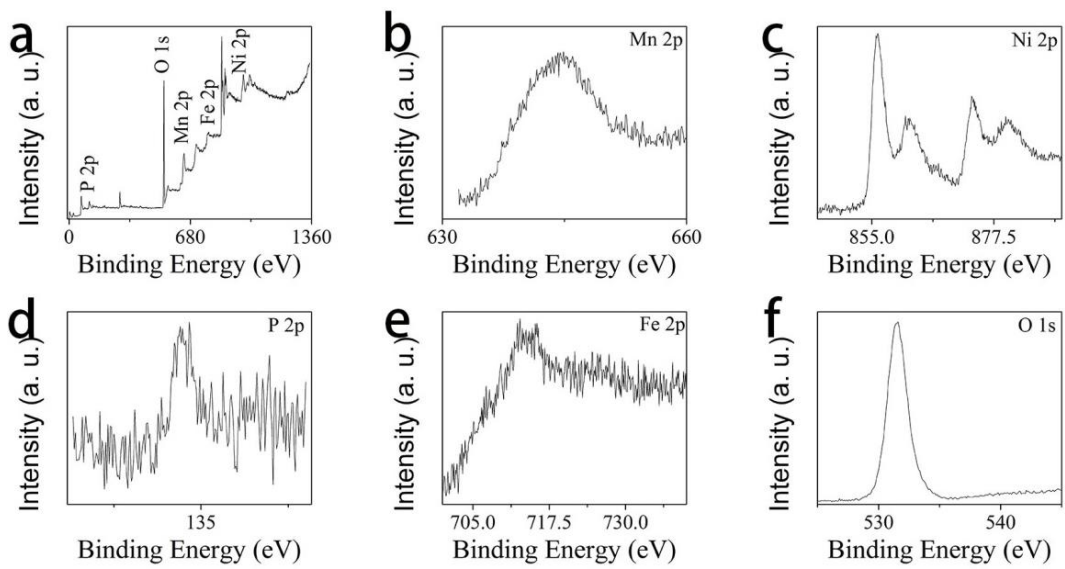

Fig. S10. XPS spectra of (a) survey scan, (b) Mn 2p, (c) Ni 2p, (d) P 2p, (e) Fe 2p and (f) O 1s for the Mn-Ni<sub>2</sub>P/NiFe LDH after HER stability.



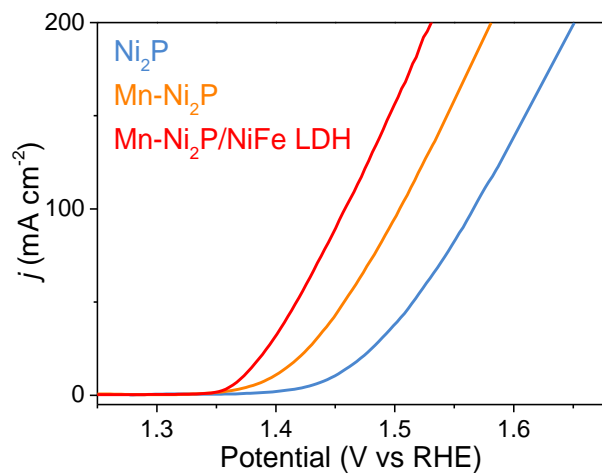

Fig. S11. LSV curves of Ni<sub>2</sub>P, Mn-Ni<sub>2</sub>P and Mn-Ni<sub>2</sub>P/NiFe LDH in 1.0 M KOH with 0.5 M urea.

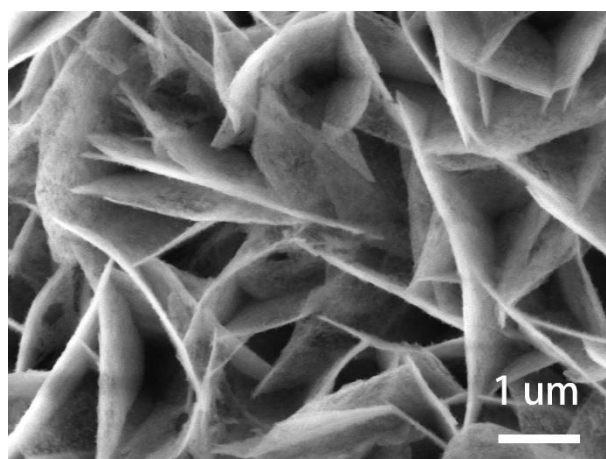

Fig. S12. SEM image of Mn-Ni<sub>2</sub>P/NiFe LDH after UOR stability.

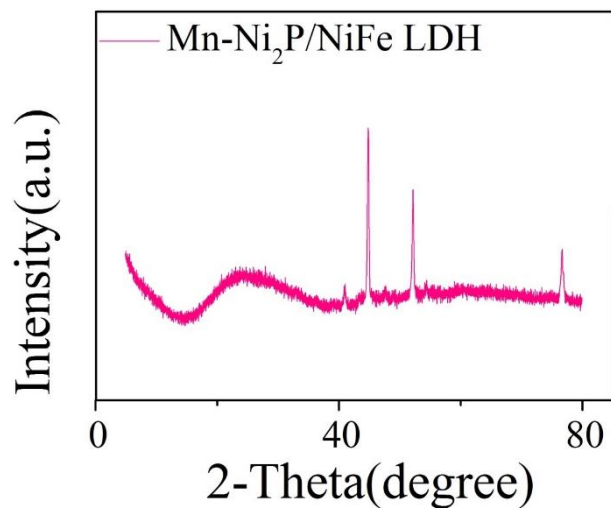

Fig. S13. XRD pattern of the Mn-Ni<sub>2</sub>P/NiFe LDH after UOR stability.

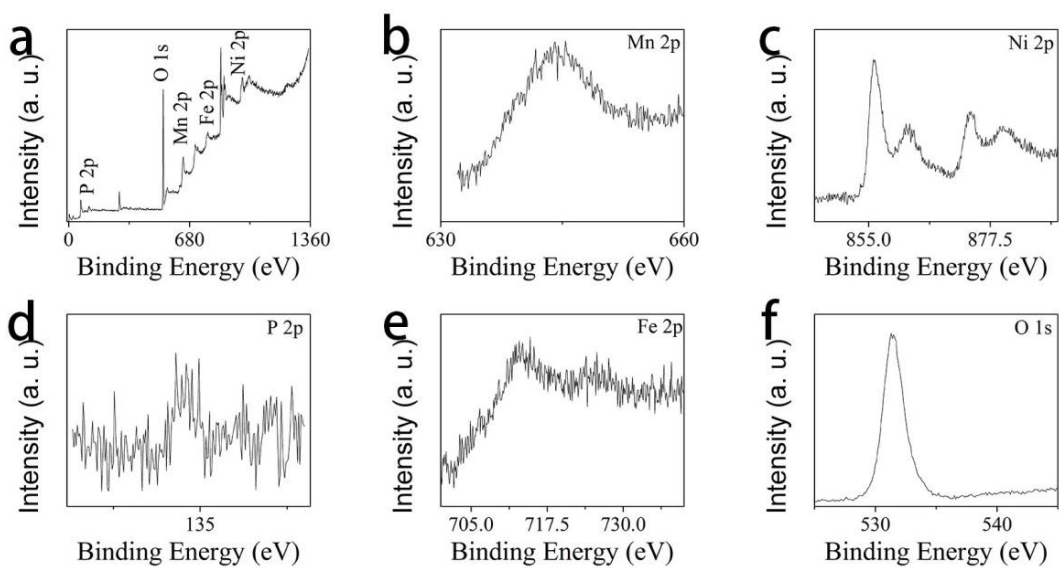

Fig. S14. XPS spectra of (a) survey scan, (b) Mn 2p, (c) Ni 2p, (d) P 2p, (e) Fe 2p and (f) O 1s for Mn-Ni<sub>2</sub>P/NiFe LDH after UOR stability.

Table S1. Comparison of UOR performance of Mn-Ni<sub>2</sub>P/NiFe LDH with other reported catalysts.

| Catalysts                                            | Overpotential (V) at<br>10 mA cm <sup>-2</sup> | References       |
|------------------------------------------------------|------------------------------------------------|------------------|
| <b>Mn-Ni<sub>2</sub>P/NiFe LDH</b>                   | <b>1.372</b>                                   | <b>This work</b> |
| Fe <sub>3</sub> O <sub>4</sub> @FeOOH-NF             | 1.38                                           | [S1]             |
| Fe <sub>2</sub> O <sub>3</sub> /NF                   | 1.41                                           | [S1]             |
| Ni/SiO <sub>x</sub> /N-C                             | 1.38                                           | [S2]             |
| NiMoSe                                               | 1.39                                           | [S3]             |
| Ce-Ni <sub>2</sub> P/NF                              | 1.4                                            | [S4]             |
| NiMo@ZnO/NF                                          | 1.4                                            | [S5]             |
| Fe-Ni <sub>3</sub> S <sub>2</sub> @FeNi <sub>3</sub> | 1.4                                            | [S6]             |
| Ni <sub>2</sub> P/NiF <sub>3</sub> /CC               | 1.4                                            | [S7]             |
| Mo-Ni <sub>2</sub> P                                 | 1.41                                           | [S8]             |
| Ni <sub>2</sub> P/CFC                                | 1.42                                           | [S9]             |
| P-CoS <sub>2</sub>                                   | 1.51                                           | [S10]            |

Table S2. Comparison of water splitting performances of Mn-Ni<sub>2</sub>P/NiFe LDH with recently reported catalysts.

| Catalysts                                                                              | Voltage (V) at 10 mA cm <sup>-2</sup> | References       |
|----------------------------------------------------------------------------------------|---------------------------------------|------------------|
| <b>Mn-Ni<sub>2</sub>P/NiFe LDH</b>                                                     | <b>1.632</b>                          | <b>This work</b> |
| NiMo-PVP/NiFe-PVP                                                                      | 1.66                                  | [S11]            |
| Ni/Mo <sub>2</sub> C-PC                                                                | 1.66                                  | [S12]            |
| NiFe/NiCo <sub>2</sub> O <sub>4</sub> /Ni foam                                         | 1.67                                  | [S13]            |
| SrNb <sub>0.1</sub> Co <sub>0.7</sub> Fe <sub>0.2</sub> O <sub>3-δ</sub><br>perovskite | 1.68                                  | [S14]            |
| Ni <sub>5</sub> P <sub>4</sub> /Ni foil                                                | 1.7                                   | [S15]            |
| Co <sub>x</sub> P@NC                                                                   | 1.71                                  | [S16]            |
| Co <sub>2</sub> B/CoSe <sub>2</sub>                                                    | 1.73                                  | [S17]            |
| V/Ni foam                                                                              | 1.74                                  | [S18]            |
| CoPS/Al <sub>2</sub> O <sub>3</sub> -3                                                 | 1.75                                  | [S19]            |
| Co/CeO <sub>2</sub> /Co <sub>2</sub> P/CoP@NC                                          | 1.76                                  | [S20]            |

Table S3. Comparison of urea electrolysis performances of Mn-Ni<sub>2</sub>P/NiFe LDH with recently reported catalysts.

| Catalysts                                                       | Voltage (V) at 10 mA cm <sup>-2</sup> | References       |
|-----------------------------------------------------------------|---------------------------------------|------------------|
| <b>Mn-Ni<sub>2</sub>P/NiFe LDH</b>                              | <b>1.494</b>                          | <b>This work</b> |
| CoMn/CoMn <sub>2</sub> O <sub>4</sub>                           | 1.51                                  | [S21]            |
| NiTe <sub>2</sub> /Ni(OH) <sub>2</sub>                          | 1.52                                  | [S22]            |
| Ni-MOF                                                          | 1.52                                  | [S23]            |
| Fe <sub>7</sub> Se <sub>8</sub> @Fe <sub>2</sub> O <sub>3</sub> | 1.55                                  | [S24]            |
| Bulk MnO <sub>2</sub>                                           | 1.55                                  | [S25]            |
| Ni@NCNT-3                                                       | 1.56                                  | [S26]            |
| MnO <sub>2</sub> /MnCo <sub>2</sub> O <sub>4</sub> /Ni          | 1.58                                  | [S27]            |
| FQD/CoNi LDH/NF                                                 | 1.59                                  | [S28]            |
| HC-NiMoS/Ti                                                     | 1.59                                  | [S29]            |
| Ni(OH) <sub>2</sub> NS@NW/NF                                    | 1.68                                  | [S30]            |

## References

- [S1] H.A. Bandal, H. Kim, *J. Colloid Interf. Sci.*, 2022, **627**, 1030.
- [S2] M.J. Yuan, X.T. Guo, N. Li, H. Pang, *J. Colloid Interf. Sci.*, 2021, **589**, 56.
- [S3] H.T. Wang, X. Jiao, W.L. Zeng, Y. Zhang, Y.L. Jiao, *Int. J. Hydrogen Energ.*, 2021, **46**, 37792.
- [S4] K. Xiong, L.J. Yu, Y. Xiang, H.D. Zhang, J. Chen, Y. Gao, *J. Alloy. Compd.*, 2022, **912**, 165234.
- [S5] J. Cao, H.C. Li, R.T. Zhu, L. Ma, K.C. Zhou, Q.P. Wei, F.H. Luo, *J. Alloy. Compd.*, 2020, **844**, 155382.
- [S6] W.X. Zhang, Q. Jia, H. Liang, L. Cui, D. Wei, J.Q. Liu, *Chem. Eng. J.*, 2020, **396**, 125315.
- [S7] K.L. Wang, W. Huang, Q.H. Cao, Y.J. Zhao, X.J. Sun, R. Ding, W.W. Lin, E.H. Liu, P. Gao, *Chem. Eng. J.*, 2022, **427**, 130865.
- [S8] K. Zhang, G. Zhang, J.H. Qu, H.J. Liu, *J. Mater. Chem. A*, 2018, **6**, 10297.
- [S9] X. Zhang, Y.Y. Liu, Q.Z. Xiong, G.Q. Liu, C.J. Zhao, G.Z. Wang, Y.X. Zhang, H.M. Zhang, H.J. Zhao, *Electrochim. Acta.*, 2017, **254**, 44.
- [S10] Y. Jiang, S.S. Gao, J.L. Liu, G.C. Xu, Q. Jia, F.S. Chen, X.M. Song, *Nanoscale*, 2020, **12**,

11573.

[S11] Y.Q. Zhang, X.H. Xia, X. Cao, B.W. Zhang, N.H. Tiep, H.Y. He, S. Chen, Y.Z. Huang, H.J. Fan, *Adv. Energy Mater.*, 2017, **7**, 1700220.

[S12] Z.Y. Yu, Y. Duan, M.R. Gao, C.C. Lang, Y.R. Zheng, S.H. Yu, *Chem. Sci.*, 2017, **8**, 968.

[S13] C.L. Xiao, Y.B. Li, X.Y. Lu, C. Zhao, *Adv. Funct. Mater.*, 2016, **26**, 3515.

[S14] Y.L. Zhu, W. Zhou, Y.J. Zhong, Y.F. Bu, X.Y. Chen, Q. Zhong, M.L. Liu, Z.P. Shao, *Adv. Energy Mater.*, 2017, **7**, 1602122.

[S15] M. Ledendecker, S.K. Calderon, C. Papp, H.P. Steinruck, M. Antonietti, M. Shalom, *Angew. Chem. Int. Ed.*, 2015, **127**, 12538.

[S16] J.S. Li, L.X. Kong, Z.X. Wu, S. Zhang, X.Y. Yang, J.Q. Sha, G.D. Liu, *Carbon*, 2019, **145**, 694.

[S17] Y. Guo, Z. Yao, C. Shang, E. Wang, *ACS Appl. Mater. Interfaces*, 2017, **9**, 39312.

[S18] Y. Yu, P. Li, X.F. Wang, W.Y. Gao, Z.X. Shen, Y.N. Zhu, S.L. Yang, W.G. Song, K.J. Ding, *Nanoscale*, 2016, **8**, 10731.

[S19] T. Wang, Y. Zhang, Y. Wang, J. Zhou, L. Wu, Y. Sun, X. Xu, W. Hou, X. Zhou, Y. Du, W. Zhong, *ACS Sustainable Chem. Eng.*, 2018, **6**, 10087.

[S20] X.Z. Song, Q.F. Su, S.J. Li, G.C. Liu, N. Zhang, W.Y. Zhu, Z.H. Wang, Z. Tan, *Int. J. Hydrogen Energy*, 2020, **45**, 30559.

[S21] C. Wang, H.L. Lu, Z.Y. Mao, C.L. Yan, G.Z. Shen, X.F. Wang, *Adv. Funct. Mater.*, 2020, **30**, 2000556.

[S22] B. Xu, X.D. Yang, X.P. Liu, W.X. Song, Y.Q. Sun, Q.S. Liu, H.X. Yang, C.C. Li, *J. Power Sources*, 2020, **449**, 227585.

[S23] S.S. Zheng, Y. Zheng, H.G. Xue, H. Pang, *Chem. Eng. J.*, 2020, **395**, 125166.

[S24] J.X. Li, X.Q. Du, X.S. Zhang, Z.P. Wang, *Int. J. Hydrogen Energy*, 2022, **47**, 35203.

[S25] S. Chen, J.J. Duan, A. Vasileff, S.Z. Qiao, *Angew. Chem. Int. Edit.*, 2016, **55**, 3804.

[S26] Q. Zhang, F.M.D. Kazim, S.X. Ma, K.G. Qu, M. Li, Y.G. Wang, H. Hu, W.W. Cai, Z.H. Yang, *Appl. Catal. B-Environ.*, 2021, **280**, 119436.

[S27] C.L. Xiao, S. Li, X.Y. Zhang, D.R. MacFarlane, *J. Mater. Chem. A*, 2017, **5**, 7825.

[S28] Y.Q. Feng, X. Wang, J.F. Huang, P.P. Dong, J. Ji, J. Li, L.Y. Cao, L.L. Feng, P. Jin, C.R. Wang, *Chem. Eng. J.*, 2020, **390**, 124525.

[S29] X.X. Wang, J.M. Wang, X.P. Sun, S. Wei, L. Cui, W.R. Yang, J.Q. Liu, *Nano Res.*, 2018, **11**, 988.

[S30] Z.H. Yue, S.Y. Yao, Y.Z. Li, W.X. Zhu, W.T. Zhang, R. Wang, J. Wang, L.J. Huang, D.Y. Zhao, J.L. Wang, *Electrochim. Acta.*, 2018, **268**, 211.
